# Supplementary material
Source: PubMed Central journal article supplement (PMC6544490)
Supplement: NIHMS1526306-supplement-1.pdf [file NIHMS1526306-supplement-1.pdf]

## **SUPPLEMENTAL MATERIAL**

## I. Risk of bias among observational studies

To further assess the risk of bias among observational studies (OBSs), we used the average standardized absolute mean difference (ASAMD) to assess balance between statin-treated and comparison groups, with lower ASAMD indicating better balance.<sup>1</sup> Balance was assessed across covariates selected based on past evidence and theory. ASAMD was calculated by subtracting each of the comparison group means from the corresponding statin-treated group mean, taking the absolute value of each difference, dividing each absolute difference by the pooled standard deviation of the covariate (if continuous), and then computing the mean of the standardized absolute differences.<sup>1</sup>

## II. Supplemental figures

**Supplemental Figure 1. Summary of quality assessment for included eight randomized controlled trials examining statin-associated type 2 diabetes risk.**

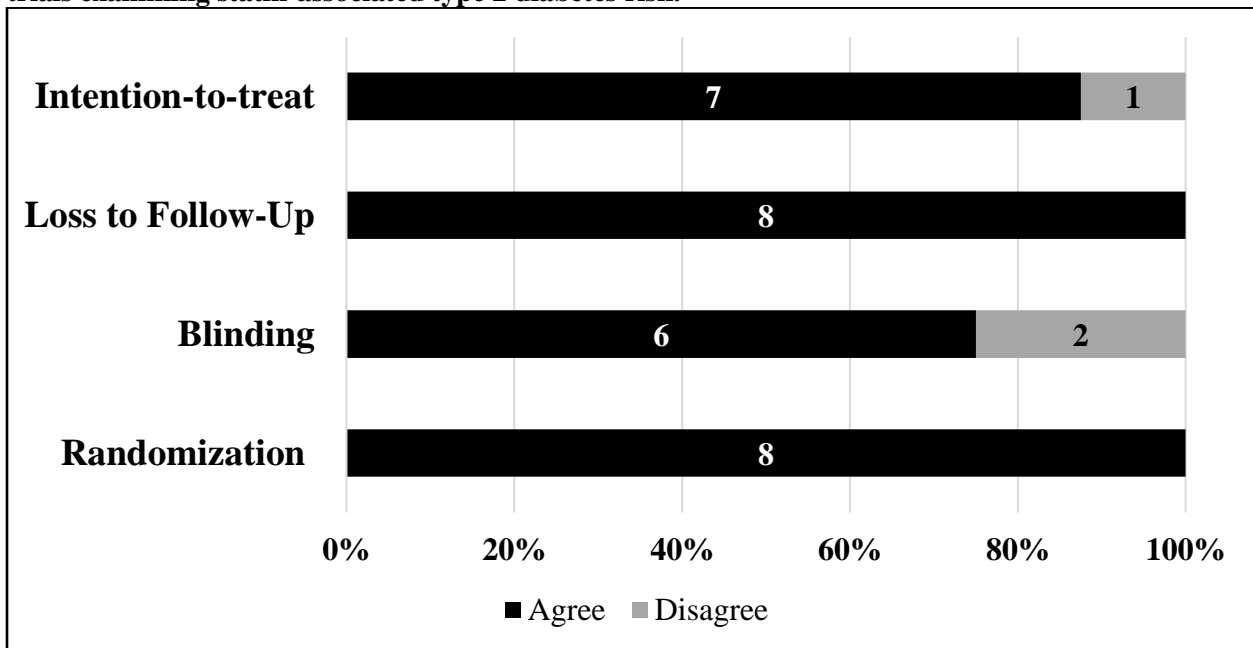

**Supplemental Figure 2. Summary of quality assessment for included 15 observational studies examining statin-associated type 2 diabetes risk.**

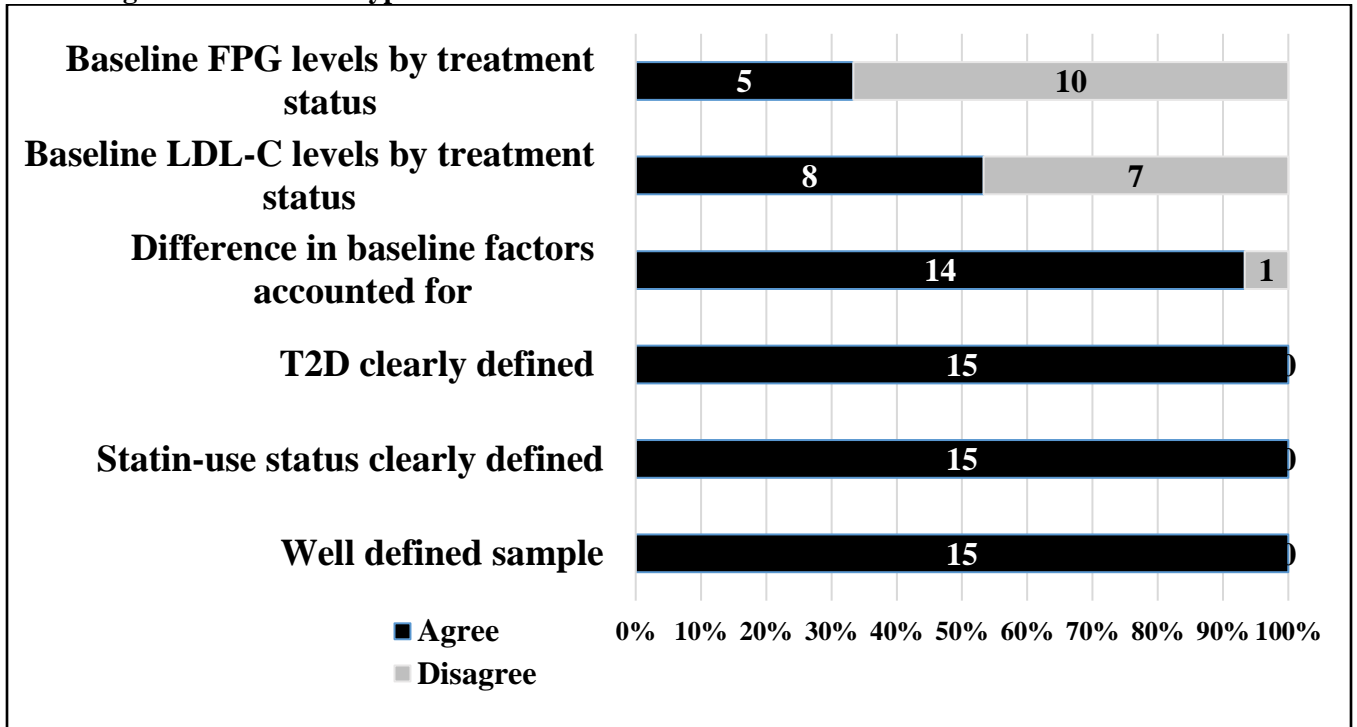

FPG = Fasting plasma glucose  
 LDL-C = Low-density lipoprotein  
 T2D = Type 2 diabetes

**Supplemental Figure 3. Funnel plot displaying reported and imputed relative risks examining statin-associated type 2 diabetes risk overall.**

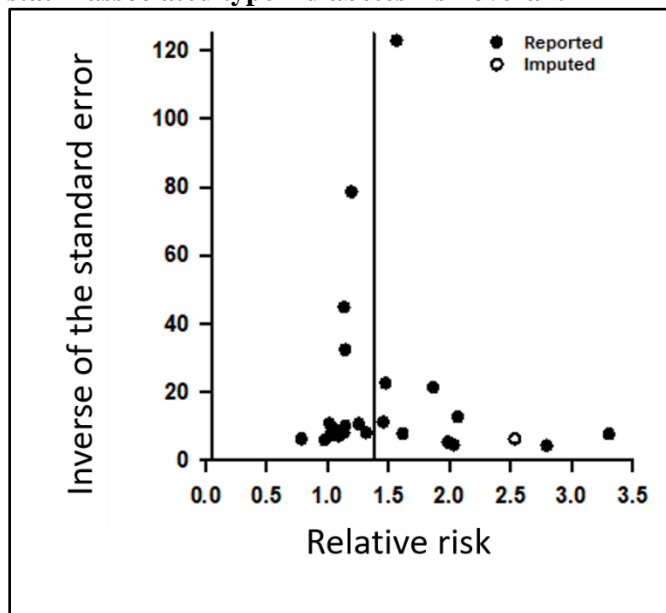

**Supplemental Figure 4. Funnel plots displaying reported and imputed relative risks examining statin-associated type 2 diabetes risk among randomized controlled trials and observational studies.**

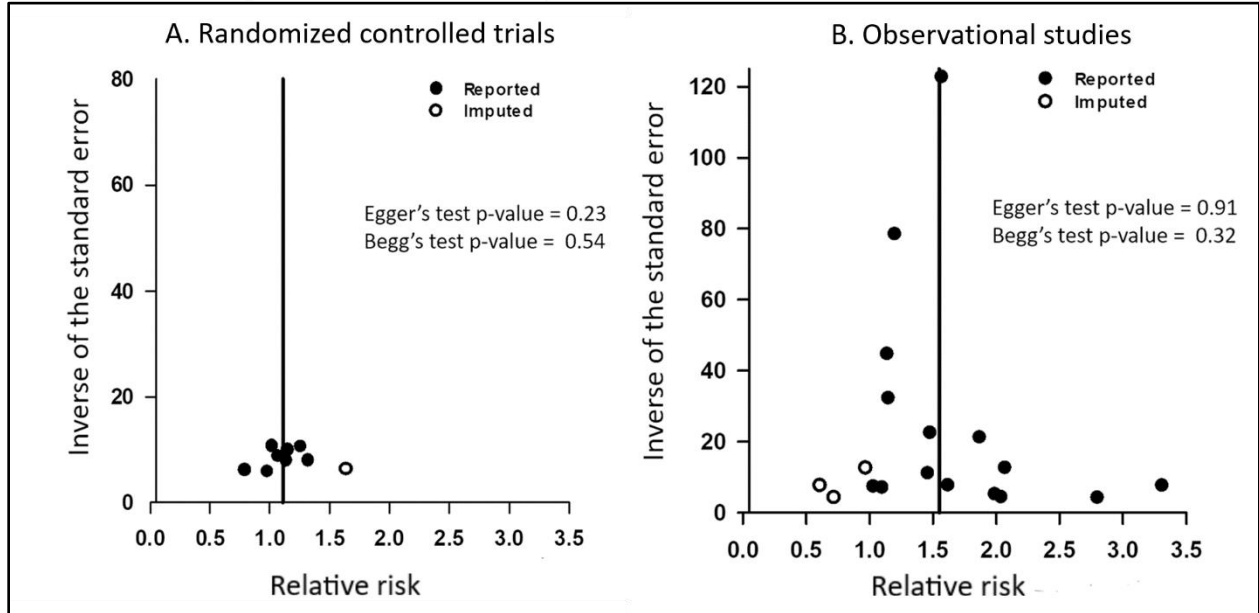

**Supplemental Figure 5. Galbraith plot displaying relative risks examining statin-associated type 2 diabetes risk and 95% confidence intervals overall.**

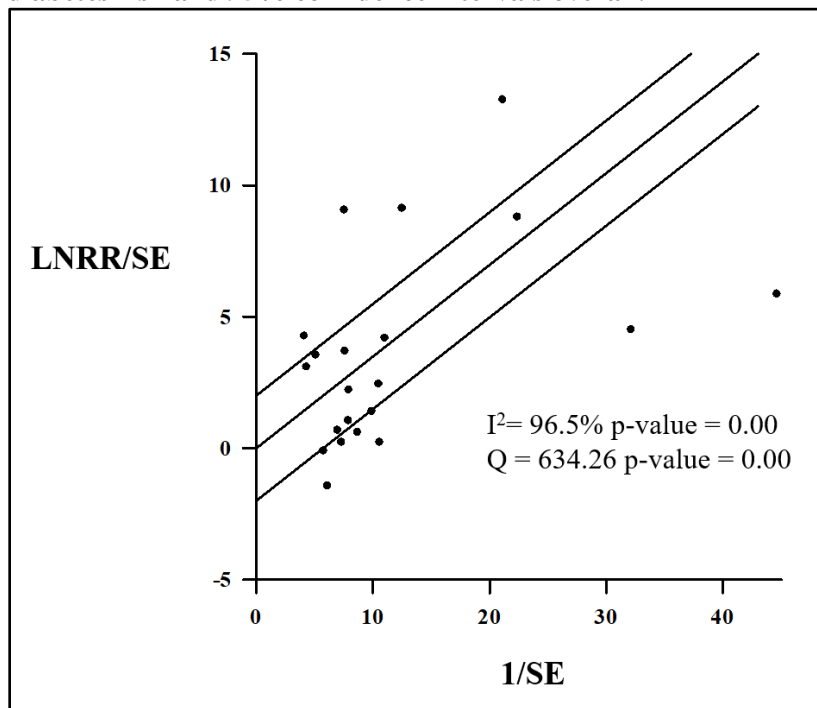

**Supplemental Figure 6. Galbraith plot displaying relative risks examining statin-associated type 2 diabetes risk and 95% confidence intervals among randomized controlled trials and observational studies.**

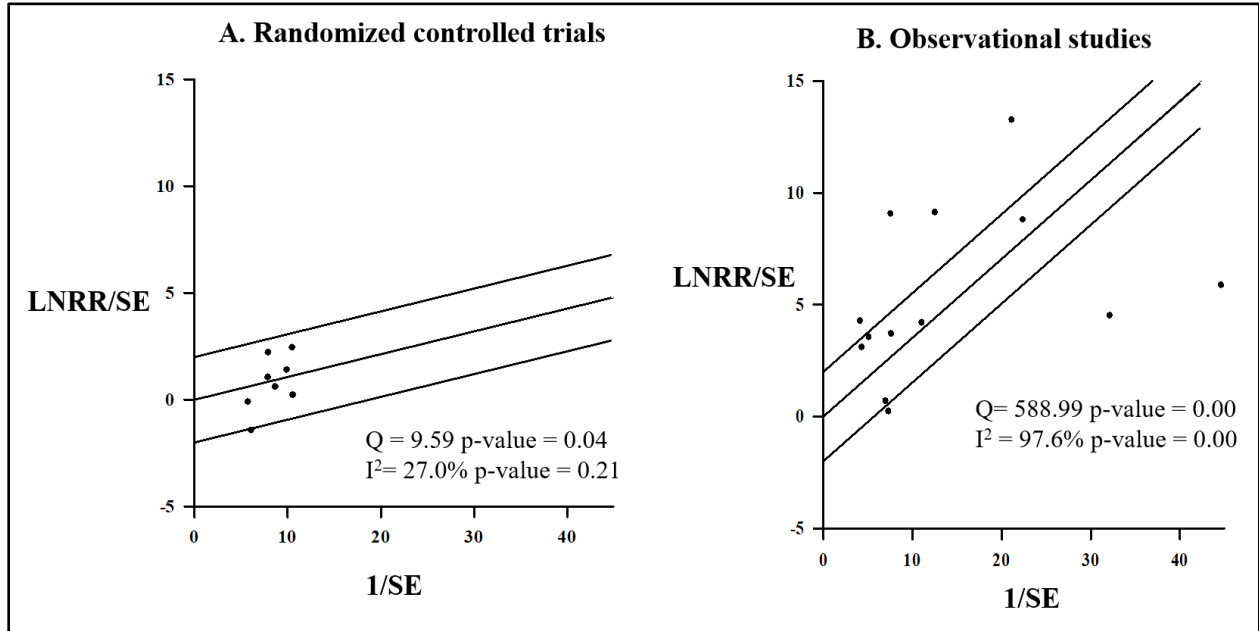

### III. Supplemental tables

#### **Supplemental Table 1. Study and baseline participant characteristics abstracted from 23 studies examining statin-associated type 2 diabetes risk.**

|                                                                                                                                                                                                                                                                                                                                                                                                                                                                                                                                                                                                                                                                                                                                                                                                                                                                                                                                                                                                                     |
|---------------------------------------------------------------------------------------------------------------------------------------------------------------------------------------------------------------------------------------------------------------------------------------------------------------------------------------------------------------------------------------------------------------------------------------------------------------------------------------------------------------------------------------------------------------------------------------------------------------------------------------------------------------------------------------------------------------------------------------------------------------------------------------------------------------------------------------------------------------------------------------------------------------------------------------------------------------------------------------------------------------------|
| <p><b>Study characteristics</b></p> <p>Study design (randomized controlled trials cohort, case-control, cross sectional)</p> <p>Mean length of follow-up time</p> <p>Study sample size</p> <p>Year of publication data</p> <p>Year of study baseline</p> <p>Method to control confounding (propensity score, adjusted in the model, randomization, did not adjust)</p> <p>Methods to measure and define type 2 diabetes status (physician diagnosis, medication data, laboratory data)</p> <p>Type of effect estimate metric (odds ratio, relative risk, hazard ratio)</p> <p><b>Participant characteristics</b></p> <p>% Female</p> <p>Mean Age (10-year age groups)</p> <p>% Caucasian</p> <p>Residence of participant</p> <p>% prescribed statins</p> <p>Type of statins included</p> <p>Mean BMI</p> <p>Mean LDL-C levels</p> <p>Mean fasting plasma glucose levels</p> <p>Mean systolic blood pressure levels</p> <p>% hypertensive</p> <p>% current smokers</p> <p>% of population with ASCVD at baseline</p> |
|---------------------------------------------------------------------------------------------------------------------------------------------------------------------------------------------------------------------------------------------------------------------------------------------------------------------------------------------------------------------------------------------------------------------------------------------------------------------------------------------------------------------------------------------------------------------------------------------------------------------------------------------------------------------------------------------------------------------------------------------------------------------------------------------------------------------------------------------------------------------------------------------------------------------------------------------------------------------------------------------------------------------|



**Supplemental Table 2. Additional characteristics of interest among eight randomized controlled trials examining statin-associated type 2 diabetes risk.**

| Study characteristics        |                         | Participant characteristics |                |                      |                                            |                |                   |                                         |
|------------------------------|-------------------------|-----------------------------|----------------|----------------------|--------------------------------------------|----------------|-------------------|-----------------------------------------|
| Studies                      | Type of effect estimate | Residence of participant    | Type of statin | % prescribed statins | Mean systolic blood pressure levels (mmHG) | % Hypertensive | % Current smokers | % of populations with ASCVD at baseline |
| Downs (1998) <sup>2</sup>    | RR                      | North America               | Lovastatin     | 49.8                 | 138                                        | 22             | 12.5              | 0                                       |
| Freeman (2001) <sup>3</sup>  | HR                      | Europe                      | Pravastatin    | 50                   | 135                                        | 16             | 43                | 0                                       |
| Furberg (2002) <sup>4</sup>  | RR                      | North America               | Pravastatin    | 49.6                 | 145                                        | 100            | 23.2              | 14                                      |
| Shepherd (2002) <sup>5</sup> | HR                      | Europe                      | Pravastatin    | 50                   | 154.6                                      | 61.9           | 26.8              | 44.2                                    |
| Sever (2003) <sup>6</sup>    | HR                      | Europe                      | Atorvastatin   | 50                   | 164.2                                      | 100            | 32.7              | 11                                      |
| Nakamura (2006) <sup>7</sup> | HR                      | Asia                        | Pravastatin    | 49.5                 | 132.25                                     | 40.9           | 15.4              | 0                                       |
| Ridker (2008) <sup>8</sup>   | HR                      | Multiple                    | Rosuvastatin   | 50                   | 134                                        | NA             | 15.8              | 0                                       |
| Yusuf (2016) <sup>9</sup>    | HR                      | Multiple                    | Rosuvastatin   | 50                   | 137.9                                      | 37.8           | 26.8              | 0                                       |

|                          |    |       |      |      |     |
|--------------------------|----|-------|------|------|-----|
| 8 studies<br>(1998-2016) | 50 | 142.6 | 54.1 | 24.5 | 8.7 |
|--------------------------|----|-------|------|------|-----|

ASCVD = Atherosclerotic cardiovascular disease

**Supplemental Table 3. Additional characteristics of interest among 15 observational studies examining statin-associated type 2 diabetes risk.**

| Study characteristics       |                         |                                 | Participant characteristics |                       |                                            |                |                   |                                         |
|-----------------------------|-------------------------|---------------------------------|-----------------------------|-----------------------|--------------------------------------------|----------------|-------------------|-----------------------------------------|
| Studies                     | Type of effect estimate | Method to deal with confounding | Residence of participant    | % prescribed statins* | Mean systolic blood pressure levels (mmHG) | % Hypertensive | % Current smokers | % of populations with ASCVD at baseline |
| Jick (2004) <sup>10</sup>   | OR                      | Controlled                      | Europe                      | 22.0                  | NA                                         | 40.23          | 22.2              | 0.0                                     |
| Culver (2012) <sup>11</sup> | HR                      | Controlled                      | North America               | 7.0                   | NA                                         | NA             | 7.0               | 15.9                                    |
| Wang (2012) <sup>12</sup>   | HR                      | Unadjusted                      | Asia                        | 20.0                  | NA                                         | NA             | NA                | 47.0                                    |
| Danaei (2012) <sup>13</sup> | HR                      | Controlled                      | Europe                      | 4.9                   | NA                                         | 51.3           | 42.1              | 0.0                                     |
| Izzo (2013) <sup>14</sup>   | HR                      | Controlled                      | Europe                      | 14.0                  | 141.8                                      | NA             | NA                | 0.0                                     |
| Chen (2013) <sup>15</sup>   | OR                      | Controlled                      | Asia                        | 3.8                   | NA                                         | 4.0            | NA                | 4.0                                     |

|                                   |    |                   |               |      |       |      |      |      |
|-----------------------------------|----|-------------------|---------------|------|-------|------|------|------|
| Currie (2013) <sup>16</sup>       | HR | Controlled        | Oceania       | 39.3 | NA    | NA   | NA   | NA   |
| Zaharan (2013) <sup>17</sup>      | HR | Controlled        | Europe        | 13.5 | NA    | NA   | NA   | 5.0  |
| Macedo (2014) <sup>18</sup>       | HR | Propensity scores | Europe        | 21.4 | NA    | 26.2 | 17.7 | 36.0 |
| Bhattacharya (2014) <sup>19</sup> | OR | Controlled        | North America | 50.0 | NA    | NA   | 18.5 | 10.0 |
| Cederberg (2014) <sup>20</sup>    | HR | Controlled        | Europe        | NA   | NA    | NA   | NA   | 12.0 |
| Mansi (2015) <sup>21</sup>        | OR | Propensity scores | North America | 50.0 | NA    | 35.4 | 6.2  | 0.0  |
| Radford (2015) <sup>22</sup>      | OR | Controlled        | North America | 14.3 | NA    | 12.3 | 12   | 0.0  |
| Olotu (2016) <sup>23</sup>        | OR | Propensity scores | North America | 50.0 | NA    | 17.3 | NA   | NA   |
| Rha (2016) <sup>24</sup>          | OR | Propensity scores | Asia          | 21.0 | NA    | 53.0 | NA   | 13.0 |
| 15 studies (2004-2016)            |    |                   |               | 23.7 | 141.8 | 30.0 | 18.0 | 11.0 |

\*All OBSs included multiple statins  
ASCVD = Atherosclerotic cardiovascular disease



**Supplemental Table 4. Results from meta-regression models among 23 randomized controlled trials and observational studies examining statin-associated type 2 diabetes risk.**

| Characteristics                               | N  | Relative risk (95% CI) | P-value |
|-----------------------------------------------|----|------------------------|---------|
| <b>Study characteristics</b>                  |    |                        |         |
| Study design                                  | 23 |                        |         |
| Randomized controlled trials                  | 8  | Ref                    |         |
| Observational studies                         | 15 | 1.45 (1.11-1.88)       | 0.01*   |
| Mean length of follow-up                      | 23 | 0.99 (0.96-1.03)       | 0.71    |
| Sample size                                   | 23 | 1 (0.99,1.00)          | 0.92    |
| Year of publication                           | 23 | 1.03 (1.00-1.06)       | 0.01*   |
| Year of baseline                              | 23 | 1.02(0.99-1.05)        | 0.10    |
| Methods address confounders                   | 23 |                        |         |
| Randomization                                 | 8  | Ref                    |         |
| Controlled                                    | 10 | 1.40 (1.05-1.85)       | 0.03*   |
| Propensity or unadjusted                      | 5  | 1.53 (1.01-2.15)       | 0.02*   |
| Type of effect estimate metric                | 23 |                        |         |
| Hazard ratio                                  | 16 | Ref                    |         |
| Relative risk or odds ratio                   | 7  | 1.12 (0.81-1.56)       | 0.48    |
| Methods to measure and define T2D             | 23 |                        |         |
| Physician report, medication use, lab results | 6  | Ref                    |         |
| 2 out of 3 methods                            | 9  | 1.25 (0.88-1.79)       | 0.20    |
| 1 out of 3 methods or self-report             | 8  | 1.40 (0.97-2.01)       | 0.07    |
| <b>Participant characteristics</b>            |    |                        |         |
| Residence of participants                     | 23 |                        |         |
| Europe                                        | 9  | Ref                    |         |
| North America                                 | 7  | 1.30 (0.93-1.82)       | 0.12    |
| Other                                         | 7  | 1.30 (0.92-1.83)       | 0.13    |
| % Women                                       | 23 | 1.49 (0.81-2.76)       | 0.19    |
| Mean age (10-year increase)                   | 21 | 0.79 (0.63-0.98)       | 0.04*   |
| % Caucasian                                   | 21 | 0.88 (0.59-1.32)       | 0.52    |
| Proportion taking statins                     | 22 |                        |         |
| >30%                                          | 12 | Ref                    |         |
| <30%                                          | 10 | 1.03 (0.76-1.39)       | 0.85    |
| Mean BMI (kg/m <sup>2</sup> )                 | 15 | 0.98 (0.90-1.07)       | 0.69    |

|                                                               |    |                  |        |
|---------------------------------------------------------------|----|------------------|--------|
| Mean LDL-C levels<br>(10-mg/dl increase)                      | 15 | 0.92 (0.87-0.97) | <0.01* |
| Mean plasma glucose<br>levels (10-mg/dl<br>increase)          | 12 | 0.98 (0.83-1.16) | 0.80   |
| Mean systolic blood<br>pressure levels (10-<br>mmHG increase) | 9  | 1.00 (0.99-1.02) | 0.37   |
| % Hypertensive                                                | 15 | 0.68 (0.34-1.33) | 0.23   |
| % Current smokers                                             | 15 | 0.27 (0.11-0.68) | 0.01*  |
| % ASCVD                                                       | 21 | 1.23 (0.54-2.78) | 0.61   |

---

\*P-value <0.05

FPG = Fasting plasma glucose

BMI = Body mass index

LDL-C = Low-density lipoprotein cholesterol

ASCVD = Atherosclerotic cardiovascular disease

**Supplemental Table 5. Results from meta-regression models among 15 observational studies examining statin-associated type 2 diabetes risk.**

| Characteristics                                               | N  | Relative risk (95% CI) | P-value |
|---------------------------------------------------------------|----|------------------------|---------|
| <b>Study characteristics</b>                                  |    |                        |         |
| Mean length of follow-up                                      | 15 | 0.98 (0.94, 1.02)      | 0.24    |
| Sample size                                                   | 15 | 0.99 (0.99-1)          | 0.56    |
| Year of publication                                           | 15 | 1.05 (0.99-1.12)       | 0.12    |
| Year of baseline                                              | 15 | 1.02 (0.99-1.06)       | 0.20    |
| Type of effect estimate metric                                | 15 |                        |         |
| Hazard ratio                                                  | 10 | Ref                    |         |
| Odds ratio                                                    | 5  | 1.16 (0.76-1.76)       | 0.47    |
| Methods to measure and define T2D                             | 15 |                        |         |
| Used 1 method (physician report, lab results, medication use) | 6  | Ref                    |         |
| Used > 1 method                                               | 9  | 0.96 (0.64-1.43)       | 0.83    |
| Use of FPG to define T2D                                      | 15 |                        |         |
| Not used                                                      | 11 | Ref                    |         |
| Used                                                          | 4  | 0.95 (0.60-1.51)       | 0.83    |
| <b>Participant characteristics</b>                            |    |                        |         |
| Residence of participants                                     | 15 |                        |         |
| Europe                                                        | 6  | Ref                    |         |
| Other                                                         | 9  | 1.50 (1.11-2.04)       | 0.01*   |
| % Women                                                       | 15 | 1.12 (0.48-2.59)       | 0.78    |
| Mean age (10-year increase)                                   | 13 | 0.71 (0.52-0.96)       | 0.03*   |
| % Caucasian                                                   | 13 | 0.75 (0.43-1.28)       | 0.26    |
| Proportion taking statins                                     | 15 |                        |         |
| >30%                                                          | 5  | Ref                    |         |
| <30%                                                          | 10 | 0.71 (0.50-1.10)       | 0.06    |
| Mean BMI (kg/m <sup>2</sup> )                                 | 7  | 0.84 (0.70-1.01)       | 0.06    |
| Mean LDL-C levels (10-mg/dl increase)                         | 7  | 0.78 (0.67-0.92)       | 0.01*   |
| Mean glucose levels (10-mg/dl increase)                       | 5  | 0.89 (0.27-2.95)       | 0.78    |
| % Hypertensive                                                | 8  | 0.28 (0.07-1.04)       | 0.06    |
| % Current smokers                                             | 7  | 0.31 (0.11-0.87)       | 0.03*   |
| % ASCVD                                                       | 13 | 0.85 (0.28-2.61)       | 0.76    |
| Type of statin user                                           |    |                        |         |
| Prevalent User                                                | 12 | Ref                    |         |
| New User                                                      | 3  | 1.14 (0.70-1.82)       | 0.56    |

\*P-value <0.05

BMI = Body mass index  
 LDL-C = Low-density lipoprotein cholesterol  
 FPG = Fasting plasma glucose  
 ASCVD = Atherosclerotic cardiovascular disease

**Supplemental Table 6. Results from meta-regression models among eight randomized controlled trials examining statin-associated type 2 diabetes risk.**

| Characteristics                                        | N | Relative risk (95% CI) | P-value |
|--------------------------------------------------------|---|------------------------|---------|
| <b>Study characteristics</b>                           |   |                        |         |
| Mean length of follow-up                               | 8 | 0.94 (0.87-1.00)       | 0.08    |
| Sample size                                            | 8 | 1(0.99-1.00)           | 0.41    |
| Year of publication                                    | 8 | 1(0.98-1.03)           | 0.91    |
| Year of baseline                                       | 8 | 1(0.99-1.03)           | 0.43    |
| <b>Participant characteristics</b>                     |   |                        |         |
| % Women                                                | 8 | 1.39 (0.74-2.61)       | 0.24    |
| Mean age (10-year increase)                            | 8 | 1.21 (0.99-1.48)       | 0.06    |
| % Caucasian                                            | 8 | 1.05 (0.73-1.51)       | 0.76    |
| Mean BMI (kg/m <sup>2</sup> )                          | 8 | 1.03 (0.96-1.10)       | 0.34    |
| Mean LDL-C levels (10-mg/dl increase)                  | 8 | 0.96 (0.92-1.00)       | 0.10    |
| Mean glucose levels (10-mg/dl increase)                | 7 | 1.02 (0.90-1.16)       | 0.70    |
| Mean systolic blood pressure levels (10-mmHG increase) | 8 | 1.00 (0.99-1.02)       | 0.39    |
| % Hypertensive                                         | 7 | 1.30 (0.89-1.89)       | 0.14    |
| % Current smokers                                      | 8 | 0.48 (0.12-2.03)       | 0.26    |
| % ASCVD                                                | 8 | 1.66 (0.75-3.65)       | 0.17    |

BMI = Body mass index  
 LDL-C = Low-density lipoprotein cholesterol  
 ASCVD = Atherosclerotic cardiovascular disease



#### IV. Supplemental references

1. Austin PC. The relative ability of different propensity score methods to balance measured covariates between treated and untreated subjects in observational studies. *Medical Decision Making*. 2009;29:661-677.
2. Downs JR, Clearfield M, Weis S, Whitney E, Shapiro DR, Beere PA, Langendorfer A, Stein EA, Kruyer W and Gotto Jr AM. Primary prevention of acute coronary events with lovastatin in men and women with average cholesterol levels: results of AFCAPS/TexCAPS. *JAMA : the journal of the American Medical Association*. 1998;279:1615-1622.
3. Freeman DJ, Norrie J, Sattar N, Neely RDG, Cobbe SM, Ford I, Isles C, Lorimer AR, Macfarlane PW and McKillop JH. Pravastatin and the development of diabetes mellitus evidence for a protective treatment effect in the West of Scotland Coronary Prevention Study. *Circulation*. 2001;103:357-362.
4. Furberg CD, Wright JT, Davis BR, Cutler JA, Alderman M, Black H, Cushman W, Grimm R, Haywood LJ and Leenen F. Major outcomes in moderately hypercholesterolemic, hypertensive patients randomized to pravastatin vs usual care: the Antihypertensive and Lipid-Lowering Treatment to Prevent Heart Attack Trial (ALLHAT-LLT). *JAMA-Journal of the American Medical Association*. 2002;288:2998-3007.
5. Shepherd J, Blauw GJ, Murphy MB, Bollen EL, Buckley BM, Cobbe SM, Ford I, Gaw A, Hyland M and Jukema JW. Pravastatin in elderly individuals at risk of vascular disease (PROSPER): a randomised controlled trial. *The Lancet*. 2002;360:1623-1630.
6. Sever PS, Dahlöf B, Poulter NR, Wedel H, Beevers G, Caulfield M, Collins R, Kjeldsen SE, Kristinsson A and McInnes GT. Prevention of coronary and stroke events with atorvastatin in hypertensive patients who have average or lower-than-average cholesterol concentrations, in the Anglo-Scandinavian Cardiac Outcomes Trial—Lipid Lowering Arm (ASCOT-LLA): a multicentre randomised controlled trial. *The Lancet*. 2003;361:1149-1158.
7. Nakamura H, Arakawa K, Itakura H, Kitabatake A, Goto Y, Toyota T, Nakaya N, Nishimoto S, Muranaka M and Yamamoto A. Primary prevention of cardiovascular disease with pravastatin in Japan (MEGA Study): a prospective randomised controlled trial. *The Lancet*. 2006;368:1155-1163.
8. Ridker PM, Danielson E, Fonseca F, Genest J, Gotto Jr AM, Kastelein J, Koenig W, Libby P, Lorenzatti AJ and MacFadyen JG. Rosuvastatin to prevent vascular events in men and women with elevated C-reactive protein. *New England Journal of Medicine*. 2008;359:2195.
9. Yusuf S, Bosch J, Dagenais G, Zhu J, Xavier D, Liu L, Pais P, López-Jaramillo P, Leiter LA and Dans A. Cholesterol lowering in intermediate-risk persons without cardiovascular disease. *New England Journal of Medicine*. 2016;374:2021-2031.
10. Jick SS and Bradbury BD. Statins and newly diagnosed diabetes. *British journal of clinical pharmacology*. 2004;58:303-309.
11. Culver AL, Ockene IS, Balasubramanian R, Olendzki BC, Sepavich DM, Wactawski-Wende J, Manson JE, Qiao Y, Liu S and Merriam PA. Statin use and risk of diabetes mellitus in postmenopausal women in the Women's Health Initiative. *Archives of internal medicine*. 2012;172:144-152.
12. Wang K-L, Liu C-J, Chao T-F, Huang C-M, Wu C-H, Chen S-J, Chen T-J, Lin S-J and Chiang C-E. Statins, risk of diabetes, and implications on outcomes in the general population. *Journal of the American College of Cardiology*. 2012;60:1231-1238.
13. Danaei G, Rodríguez LAG, Cantero OF and Hernán MA. Statins and risk of diabetes: an analysis of electronic medical records to evaluate possible bias due to differential survival. *Diabetes care*. 2013;36:1236-1240.
14. Izzo R, De Simone G, Trimarco V, Giudice R, De Marco M, Di Renzo G, De Luca N and Trimarco B. Primary prevention with statins and incident diabetes in hypertensive patients at high cardiovascular risk. *Nutrition, Metabolism and Cardiovascular Diseases*. 2013;23:1101-1106.

15. Chen C-W, Chen T-C, Huang K-Y, Chou P, Chen P-F and Lee C-C. Differential impact of statin on new-onset diabetes in different age groups: a population-based case-control study in women from an asian country. *PLoS one*. 2013;8:e71817.
16. Currie O, Mangin D, Williman J, McKinnon-Gee B and Bridgford P. The comparative risk of new-onset diabetes after prescription of drugs for cardiovascular risk prevention in primary care: a national cohort study. *BMJ open*. 2013;3:e003475.
17. Zaharan NL, Williams D and Bennett K. Statins and risk of treated incident diabetes in a primary care population. *British journal of clinical pharmacology*. 2013;75:1118-1124.
18. Macedo AF, Taylor FC, Casas JP, Adler A, Prieto-Merino D and Ebrahim S. Unintended effects of statins from observational studies in the general population: systematic review and meta-analysis. *BMC medicine*. 2014;12:51.
19. Bhattacharya R, Ajmera M, Bhattacharjee S and Sambamoorthi U. Use of antidepressants and statins and short-term risk of new-onset diabetes among high risk adults. *Diabetes research and clinical practice*. 2014;105:251-260.
20. Cederberg H, Stančáková A, Yaluri N, Modi S, Kuusisto J and Laakso M. Increased risk of diabetes with statin treatment is associated with impaired insulin sensitivity and insulin secretion: a 6 year follow-up study of the METSIM cohort. *Diabetologia*. 2015;58:1109-1117.
21. Mansi I, Frei CR, Wang C-P and Mortensen EM. Statins and new-onset diabetes mellitus and diabetic complications: a retrospective cohort study of US healthy adults. *Journal of general internal medicine*. 2015;30:1599-1610.
22. Radford NB, DeFina LF, Barlow CE, Kerr A, Chakravorty R, Khera A and Levine BD. Effect of fitness on incident diabetes from statin use in primary prevention. *Atherosclerosis*. 2015;239:43-49.
23. Olotu BS, Shepherd MD, Novak S, Lawson KA, Wilson JP, Richards KM and Rasu RS. Use of statins and the risk of incident diabetes: a retrospective cohort study. *American Journal of Cardiovascular Drugs*. 2016;16:377-390.
24. Rha S-W, Choi BG, Seo HS, Park S-H, Park JY, Chen K-Y, Park Y, Choi SY, Shim M-S and Kim JB. Impact of statin use on development of new-onset diabetes mellitus in Asian population. *American Journal of Cardiology*. 2016;117:382-387.
